# Supplementary material for: Phenotypic and Genotypic Characterization of EnterotoxigenicEscherichia coliClinical Isolates from Northern Colombia, South America
Source: Hindawi journal article supplement (doi:10.1155/2014/236260), 2014-01-01
Supplement: f1 [file 236260.f1.pdf]

**Table S1. Characterization of 40 ETEC clinical isolates based on clinical, genotypic, and phenotypic features.**

| ETEC strain | Age <sup>a</sup> | Date of Isolation | City of Isolation | Diarrhea | Toxin <sup>b</sup> | CS         | Non Classical virulence genes        | Clonal Group | SeqT <sup>c</sup> | O:H type  | Antibiotic resistance <sup>d</sup> |
|-------------|------------------|-------------------|-------------------|----------|--------------------|------------|--------------------------------------|--------------|-------------------|-----------|------------------------------------|
| COCt 023    | 4 y              | 10/5/2009         | Cartagena         | Yes      | LT                 | ND         | <i>tia/irp2</i>                      |              | 2066              | 132:28    | AM, STX                            |
| COCt 026    | 2 y              | 11/5/2009         | Cartagena         | Yes      | LT/ST              | CS21       | <i>eata/tia/etpA/etpB</i>            |              | 4238 <sup>e</sup> | X10:4     |                                    |
| COCt 112    | 2 m              | 29/5/2009         | Cartagena         | Yes      | LT                 | ND         | ND                                   |              | 641               | (-):(+)   | AM                                 |
| COCt 122    | 2 y              | 30/5/2009         | Cartagena         | Yes      | ST                 | CS21, CFAI | <i>eata/irp2/fyuA/etpA/etpB</i>      | 1            | 2332              | 128:45    | AM, STX                            |
| COCt 123    | 1 y              | 30/5/2009         | Cartagena         | Yes      | LT                 | ND         | <i>irp2/fyuA</i>                     |              | 10                | 16:4      | AM, GM, STX                        |
| COCt 124    | 2 m              | 30/5/2009         | Cartagena         | Yes      | LT/ST              | CS5, CS6   | <i>eata/tia</i>                      | 2            | 443 <sup>f</sup>  | 167:5     |                                    |
| COCt 129    | 2 m              | 31/5/2009         | Cartagena         | Yes      | ST                 | CS21/ CFAI | <i>eata/irp2/fyuA/etpA/etpB</i>      | 1            | 2332              | 128:45    | AM, STX                            |
| COCt 131    | 5 m              | 31/5/2009         | Cartagena         | Yes      | LT                 | CS7, CS21  | <i>eata/tibA/irp2/fyuA/etpA/etpB</i> | 6            | 173               | 78:10     | AM, STX                            |
| COCt 132    | 7 m              | 31/5/2009         | Cartagena         | Yes      | LT                 | ND         | <i>fyuA</i>                          |              | 847               | X18:2     | AM, STX                            |
| COCt 137    | 4 y              | 2/6/2009          | Cartagena         | Yes      | LT                 | CS21/ CFAI | <i>eata/irp2/fyuA/etpA/etpB</i>      |              | 34                | (-):(+)   |                                    |
| COCt 142    | 3 m              | 3/6/2009          | Cartagena         | Yes      | LT                 | CS21/ CFAI | <i>eata/irp2/fyuA/etpA/etpB</i>      | 1            | 2332              | 128:45    | AM,STX                             |
| COCt 159    | 2 y              | 11/6/2009         | Cartagena         | Yes      | ST                 | CS21/ CFAI | <i>eata/irp2/fyuA/etpA/etpB</i>      |              | 4252 <sup>e</sup> | Neg(-):45 |                                    |
| COCt 161    | 2 y              | 11/6/2009         | Cartagena         | Yes      | ST                 | ND         | <i>irp2/fyuA</i>                     | 3            | 38                | 153:18    | AM, CZ, STX                        |
| COCt 193    | 1 y              | 19/6/2009         | Cartagena         | Yes      | LT/ST              | CS21/ CFAI | <i>eata/irp2/fyuA/etpA/etpB</i>      |              | 501               | 86:45     | AM                                 |
| COCt 200    | 4 y              | 20/6/2009         | Cartagena         | Yes      | LT/ST              | CS21/ CFAI | <i>eata/irp2/fyuA/etpA/etpB</i>      | 5            | 88                | 128:45    |                                    |
| COCt 201    | 3 y              | 20/6/2009         | Cartagena         | Yes      | LT/ST              | CS5, CS6   | <i>eata/tia</i>                      | 2            | 443 <sup>f</sup>  | 167:5     | AM, STX                            |
| COCt 234    | 2 y              | 1/7/2009          | Cartagena         | Yes      | LT/ST              | CS5        | <i>leoA/eata/tia/irp2/fyuA</i>       |              | 3855              | 20:5      | AM, AMC, CZ, STX                   |
| COCt 235    | 11 m             | 2/7/2009          | Cartagena         | Yes      | LT/ST              | CS5, CS6   | <i>eata/tia/irp2/fyuA</i>            | 2            | 443 <sup>f</sup>  | 167:5     | AM, STX                            |
| COCt 249    | 4 m              | 9/7/2009          | Cartagena         | Yes      | ST                 | CS21/ CFAI | <i>eata/irp2/fyuA/etpA/etpB</i>      | 1            | 2332              | 128:45    | AM, STX                            |
| COCt 253    | 3 y              | 11/7/2009         | Cartagena         | Yes      | ST                 | CS21/ CFAI | <i>eata/irp2/fyuA/etpA/etpB</i>      | 1            | 2332              | 128:45    | AM, STX                            |
| COCt 254    | 4 y              | 11/7/2009         | Cartagena         | Yes      | ST                 | CS21/ CFAI | <i>eata/irp2/fyuA/etpA/etpB</i>      |              | 4239 <sup>e</sup> | M:11      | AM                                 |
| COCt 285    | 7 m              | 19/7/2009         | Cartagena         | Yes      | ST                 | CS21/ CFAI | <i>eata/irp2/fyuA/etpA/etpB</i>      | 3            | 38                | 153:18    | AM, STX                            |
| COCt 308    | 11 m             | 26/7/2010         | Cartagena         | Yes      | LT                 | ND         | <i>irp2</i>                          |              | 155               | 21:(-)    |                                    |
| COCt 310    | 1 y              | 27/7/2009         | Cartagena         | Yes      | ST                 | CS21/ CFAI | <i>eata/irp2/etpA/etpB</i>           | 1            | 2332              | 128:45    | AM, CZ, STX                        |
| COCt 337    | 7 m              | 4/8/2009          | Cartagena         | Yes      | LT                 | CS7        | <i>eata/tibA/irp2/fyuA/etpA/etpB</i> | 6            | 173               | ND        | AM, CZ, STX                        |
| COCt 013cc  | 4 y              | 21/7/2009         | Cartagena         | No       | LT                 | CS12, CS21 | <i>irp2/fyuA</i>                     |              | 641               | (-):34    | AM                                 |
| COCt 067cc  | 4 y              | 16/12/2009        | Cartagena         | No       | LT                 | ND         | <i>irp2/fyuA/etpA/etpB</i>           |              | 100               | (-):2     |                                    |
| COCt 090cc  | 2 y              | 08/3/2010         | Cartagena         | No       | LT                 | ND         | <i>irp2/fyuA</i>                     |              | 10                | ND        | AM, STX                            |

|            |     |                       |           |     |       |                |                                     |   |                  |         |              |
|------------|-----|-----------------------|-----------|-----|-------|----------------|-------------------------------------|---|------------------|---------|--------------|
| COct 140cc | 1 y | 12/3/2010             | Cartagena | No  | LT    | CS21/ CFAI     | <i>eatA/ irp2/ fyuA/ etpA/ etpB</i> | 1 | 2332             | 128:45  | AM, AMC, STX |
| COct 149cc | 1 y | 12/3/2010             | Cartagena | No  | LT    | CS19           | <i>irp2/ fyuA</i>                   |   | 1623             | (-):19  |              |
| COct 155cc | 3 y | 12/3/2010             | Cartagena | No  | LT    | CS3, CS21, CS2 | <i>eatA/ irp2/ fyuA/ etpA/ etpB</i> |   | 4                | 6:16    | AM, STX      |
| COct 275cc | 2 y | 17/4/2010             | Cartagena | No  | LT    | CS1            | <i>irp2/ fyuA</i>                   |   | 23               | 8:9     |              |
| COct 302cc | 1 y | 17/4/2010             | Cartagena | No  | LT    | CS21, CS6      | <i>irp2</i>                         |   | 94               | 148:28  |              |
| 1COct 040  | 3 y | II <sup>g</sup> /2007 | Cartagena | Yes | LT    | CS21, CS6      | <i>eatA/ irp2/ fyuA</i>             | 4 | 1312             | 25:16   | AM, CZ, STX  |
| 1COct 043  | 1 y | II/2007               | Cartagena | Yes | LT    | CS19           | <i>irp2/ fyuA</i>                   | 5 | 88               | 8:9     |              |
| 1COsc 014  | 1 y | I <sup>g</sup> /2007  | Sincelejo | Yes | LT    | ND             | <i>irp2/ fyuA</i>                   |   | 731              | (-):27  | AM           |
| 1COsc 036  | 1 y | I/2007                | Sincelejo | Yes | LT/ST | CS5, CS6       | <i>eatA/ tia</i>                    | 2 | 443 <sup>g</sup> | 167:5   | AM, STX      |
| 1COsc 061  | 1 y | I/2007                | Sincelejo | Yes | LT    | CS21, CS6      | <i>eatA/ irp2/ fyuA</i>             | 4 | 1312             | 25:16   | AM, CZ, STX  |
| 1COsc 088  | 1 y | I/2007                | Sincelejo | Yes | LT    | CS6            | <i>irp2/ fyuA</i>                   |   | 2067             | 64:(+)  | STXi         |
| 1COsc 092  | 3 m | I/2007                | Sincelejo | Yes | LT    | ND             | <i>ND</i>                           |   | 216              | M:40/44 |              |

<sup>a</sup> Age: Child age at the time of specimen collection is given in years (y) or months (m).

<sup>b</sup> All ETEC tested positive for the ST<sub>H</sub> variant.

<sup>c</sup> SeqT determined by EcMLST (<http://mlst.ucc.ie/mlst/dbs/Ecoli>).

<sup>d</sup> Resistance to AM, ampicillin; AMC, Amoxillin/clavulanic acid; CZ, cefazolin; GM: gentamicin; STX, sulfamethoxalone.

<sup>e</sup> New MLST SeqT.

<sup>f</sup> ETEC MLST sequence with a single locus variant in the *icd* gene with 517/518 matches (mutation in T-229). The variant otherwise corresponds to SeqT443.

<sup>g</sup> I or II refers to first or second semester.

ND indicate not detected.
